# Supplementary material for: Solvent transport through hard–soft segmented polymer nanocomposites
Source: Royal Society of Chemistry journal article supplement (doi:10.1039/c5cp04432d), 2015-12-16
Supplement: c5cp04432d1.pdf [file c5cp04432d1.pdf]

### Supporting information

#### **Solvent transport through hard-soft segmented polymer nanocomposite**

**Sangram K Rath<sup>a</sup>, Saji S Edatholath<sup>b</sup>, T. Umasankar Patro<sup>c</sup>, Kathi Sudarshan<sup>d</sup>, P U Sastri<sup>e</sup>, Pradeep K Pujari<sup>d</sup> and \*G. Harikrishnan<sup>b</sup>**

*<sup>a</sup>Naval Materials Research Laboratory, Shil-Badlapur Road, Ambernath, Maharashtra, 421506, India*

*<sup>b</sup>Department of Chemical Engineering, Indian Institute of Technology Kharagpur, West Bengal, 721302, India*

*<sup>c</sup>Department of Materials Engineering, Defense Institute of Advanced Technology, Pune 411025, India*

*<sup>d</sup>Radiochemistry Division, Bhabha Atomic Research Centre, Mumbai, 400085, India*

*<sup>e</sup>Solid State Physics Division, Bhabha Atomic Research Centre, Mumbai, 400085, India*

---

\* Corresponding author: hari@iitkgp.ac.in; Tel: +913222283928; Fax: +913222255303

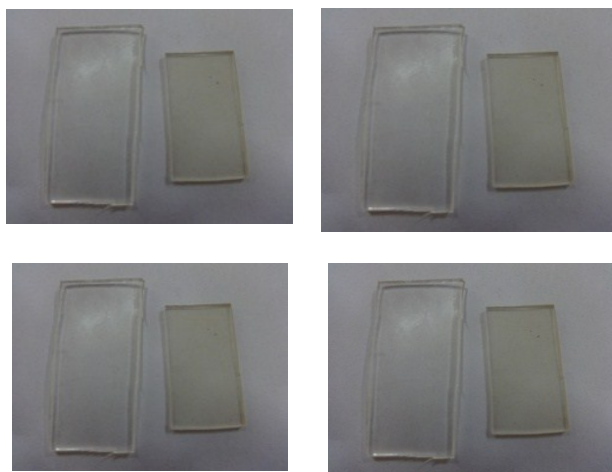

Figure S1. Photographs of films in the post equilibrium swollen (left side) and dry (right side) conditions. (a) PU; (b) PU1C; (c) PU3C; (d) PU5C

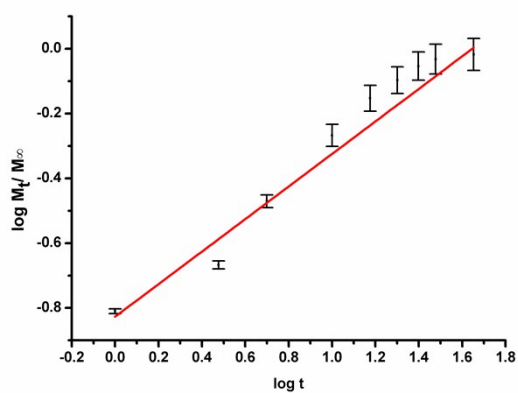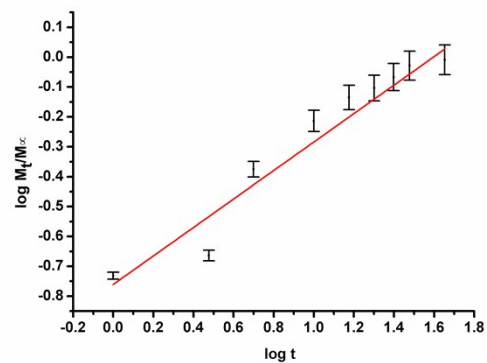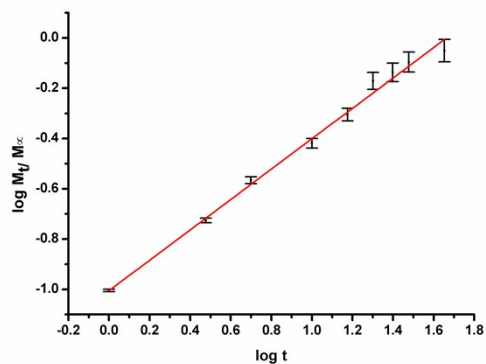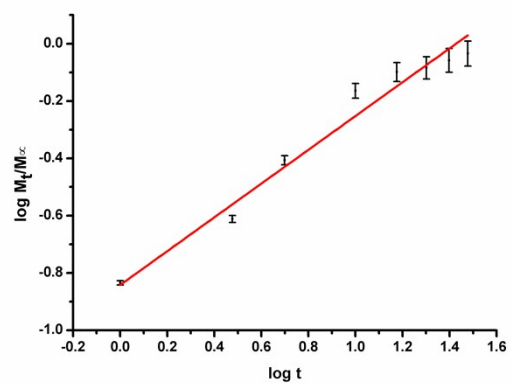

Figure S2. Plots of  $\log(M_t/M_\infty)$  against  $\log t$ : (a) PU; (b) PU1C; (c) PU3C; (d) PU5C

Table S1. Values of  $n$  obtained from the slopes in Figure S1

| Sample | $n$  |
|--------|------|
| PU     | 0.51 |
| PU1C   | 0.48 |
| PU3C   | 0.58 |
| PU5C   | 0.57 |

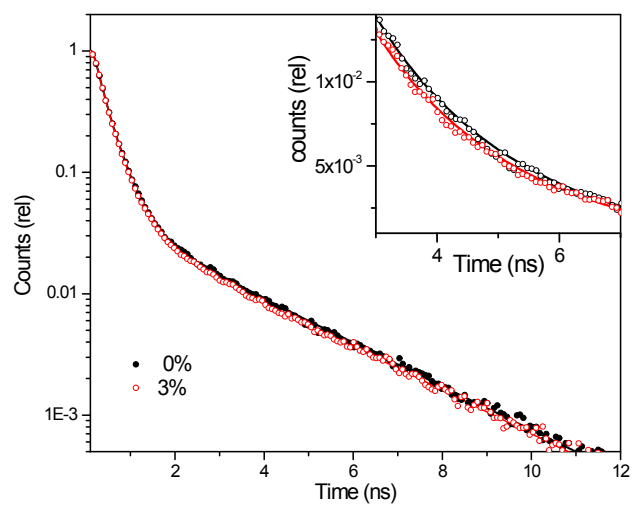

Figure S3. Sample raw spectra of positron annihilation life time spectroscopy.

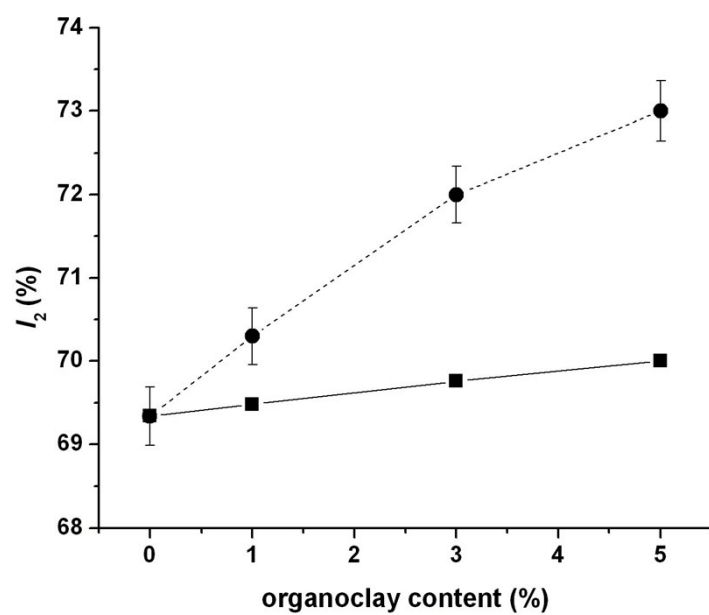

Figure S4. Second lifetime intensity as a function of clay fraction

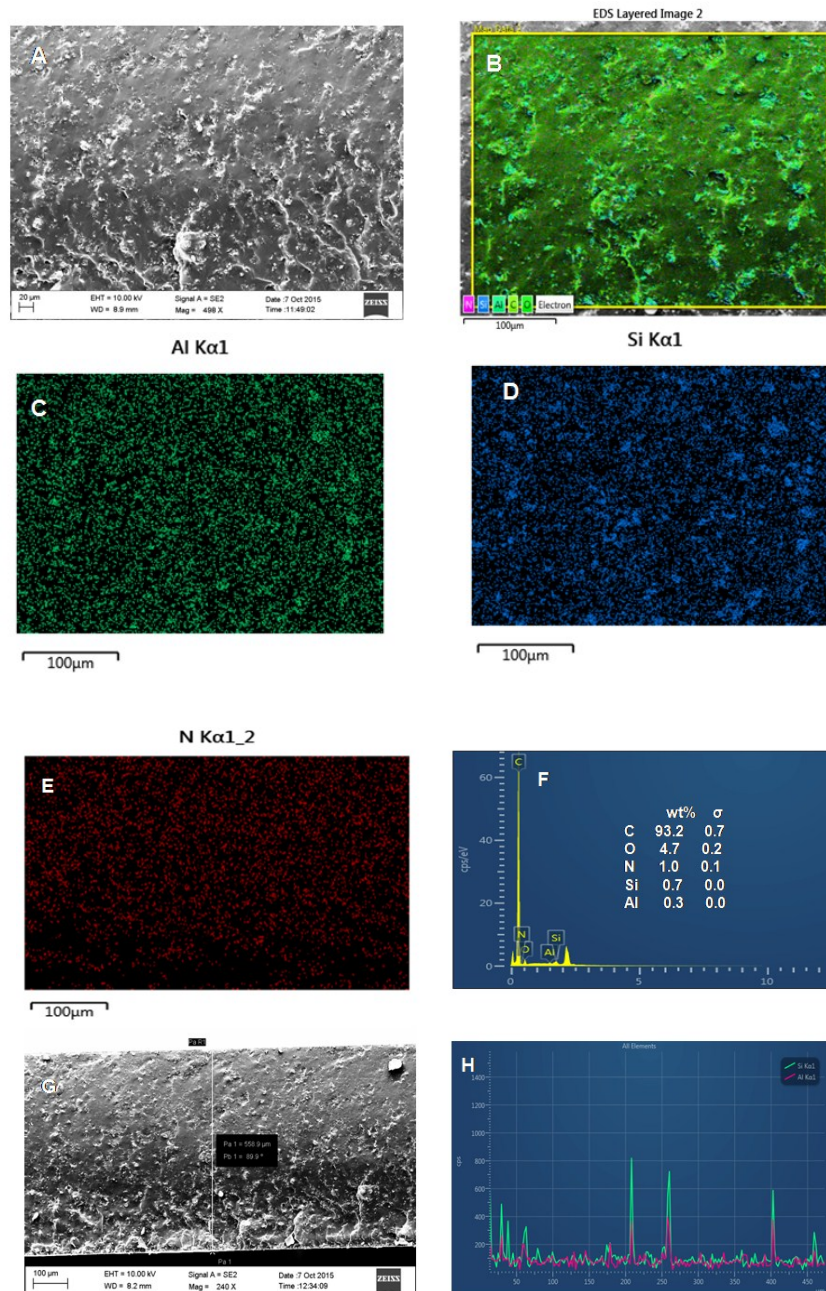

Figure S5. FESEM-EDS mapping of fractured PU5C. (A) crsoss-section morphology; (B) cross-sectional area selected for elemental mapping; (C) EDX element mapping; (D) element Al; (E) element Si; (F) element N; (G) elemental composition; (G) a line scan of cross sectional area; (H) Al and Si composition variation as a fuction of line scan distance.

Table S2. Peak positions in small angle x-ray scattering of equilibrium swollen films.

| Sample ID | Peak position (nm <sup>-1</sup> ) |                             |                             |                             |
|-----------|-----------------------------------|-----------------------------|-----------------------------|-----------------------------|
|           | P <sub>1</sub> <sup>a</sup>       | P <sub>2</sub> <sup>b</sup> | P <sub>3</sub> <sup>b</sup> | P <sub>4</sub> <sup>b</sup> |
| PU        | 1.07                              | -                           | -                           | -                           |
| PU1C      | 0.98                              | 1.64                        | 3.31                        | 4.87                        |
| PU3C      | 0.98                              | 1.62                        | 3.26                        | 4.87                        |
| PU5C      | 0.98                              | 1.57                        | 3.23                        | 4.87                        |

a; P<sub>1</sub> assigned to long range periodicity associated with hard segment domains

b: P<sub>2</sub>, P<sub>3</sub> and P<sub>4</sub> are assigned to d<sub>001</sub>, d<sub>002</sub> and d<sub>003</sub> reflections, respectively from layered structure of clay.
